# Supplementary material for: Repo-Man/PP1 regulates heterochromatin formation in interphase
Source: PubMed Central journal article supplement (PMC5241828; doi:10.1038/ncomms14048), 2017-01-16
Supplement: ncomms14048-s1.pdf [file ncomms14048-s1.pdf]

## Supplementary Figures

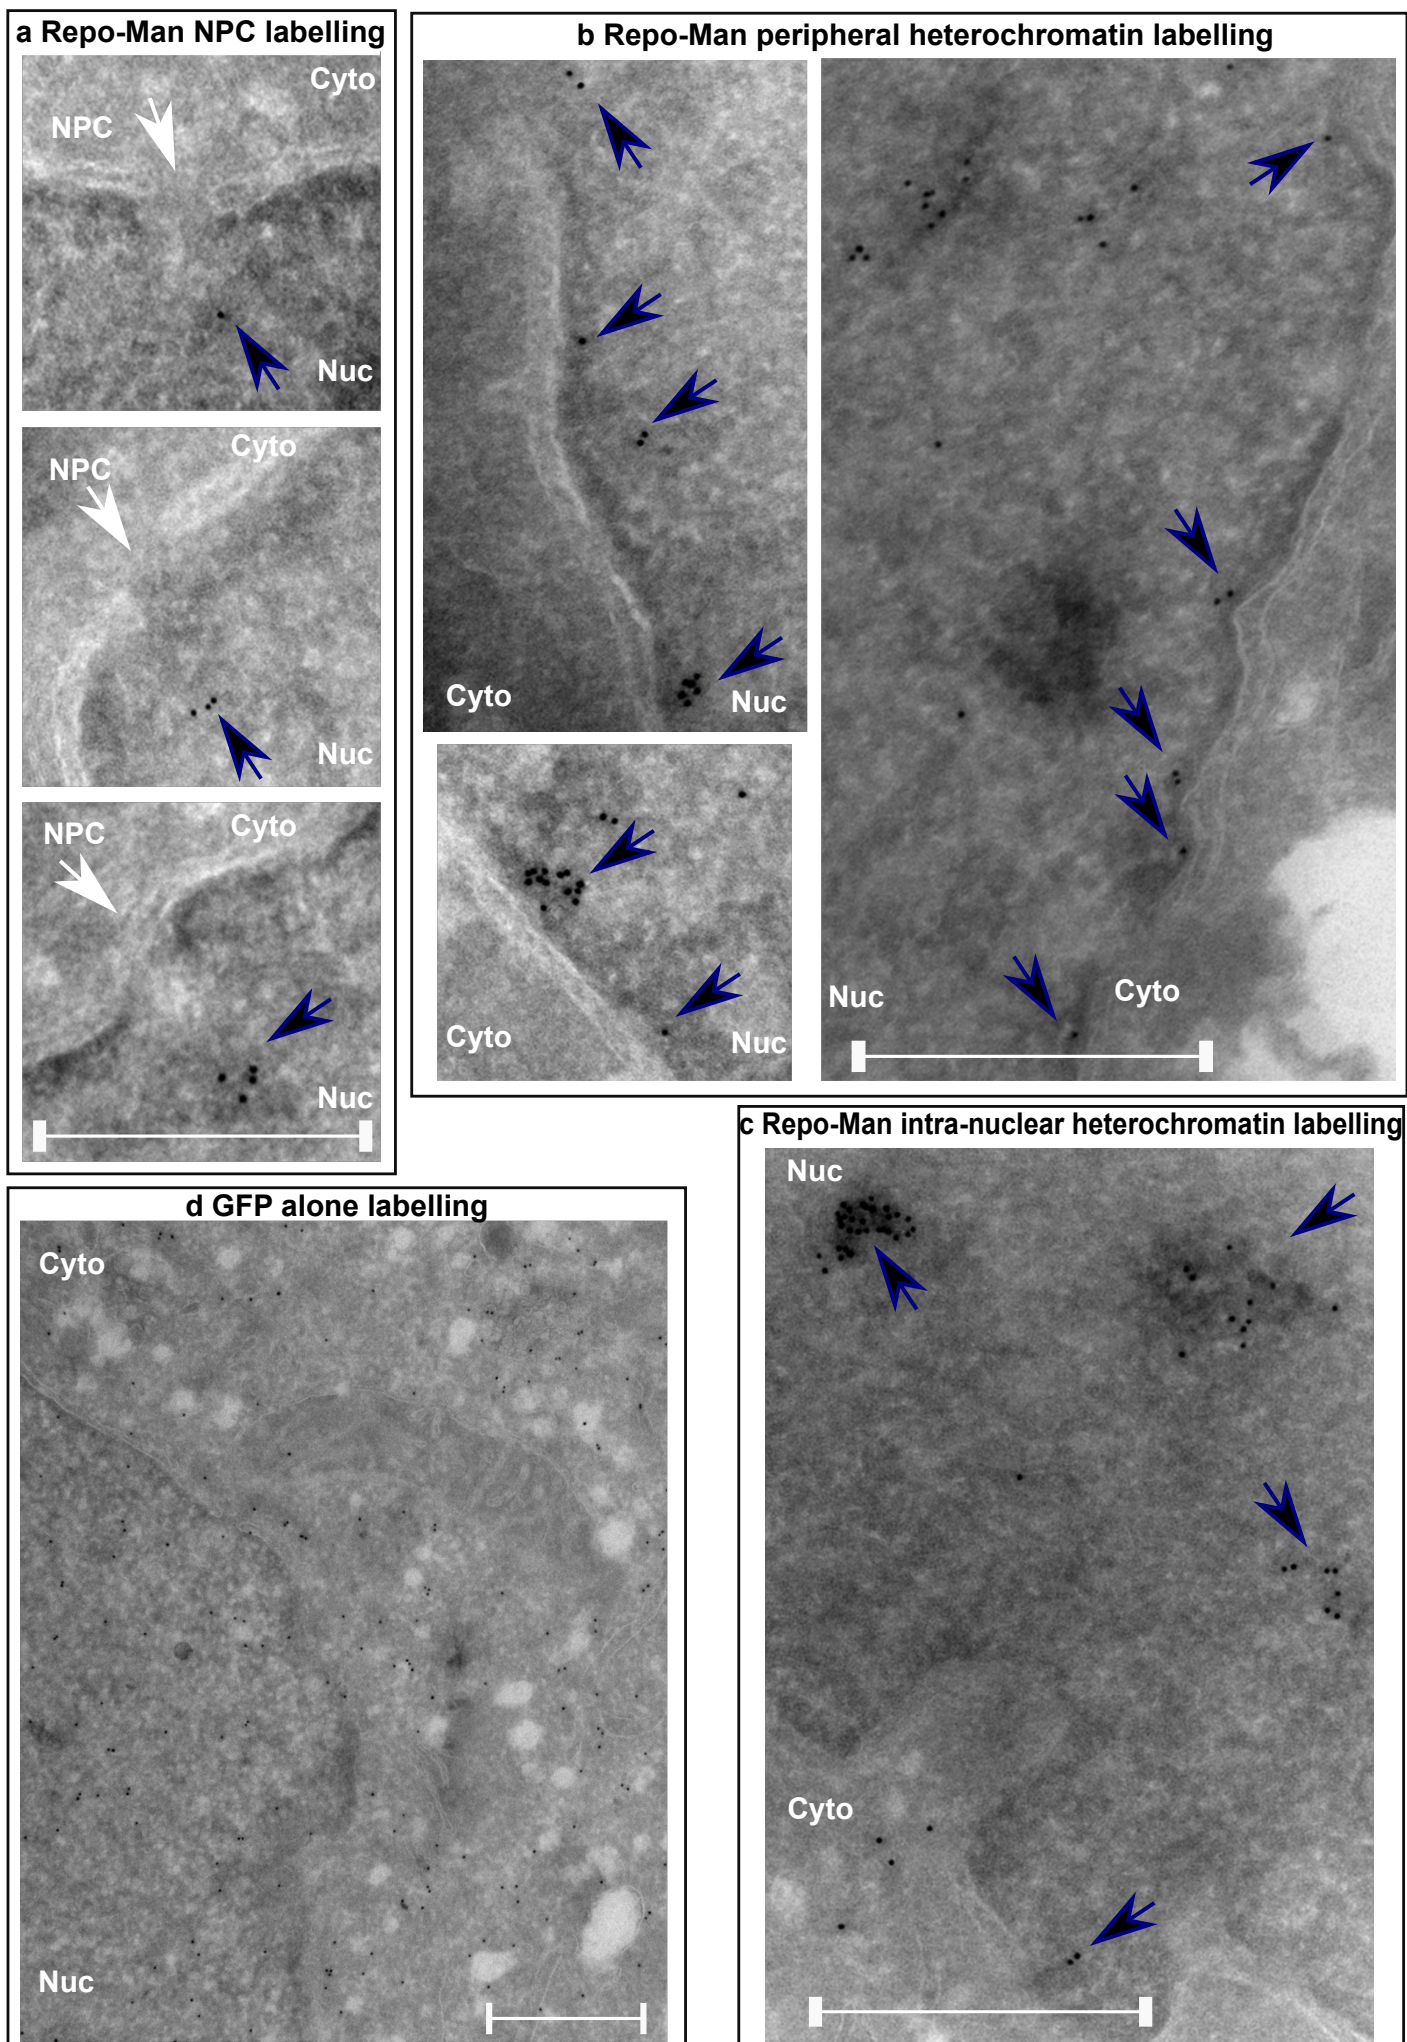

**Supplementary Figure 1:** EM labelling of Repo-Man and GFP cell lines.

HeLa cells stably expressing GFP:Repo-Man<sup>N<sup>Term</sup></sup> were stained for GFP, immunogold labelled and visualised by EM. The fused protein localises adjacent to the NPC (a) and contiguously with peripheral heterochromatin (b). Accumulation of Repo-Man is also seen at dense chromatin regions in the nuclear interior (c). Cells expressing GFP alone show widespread staining (d). bar = 500nm.

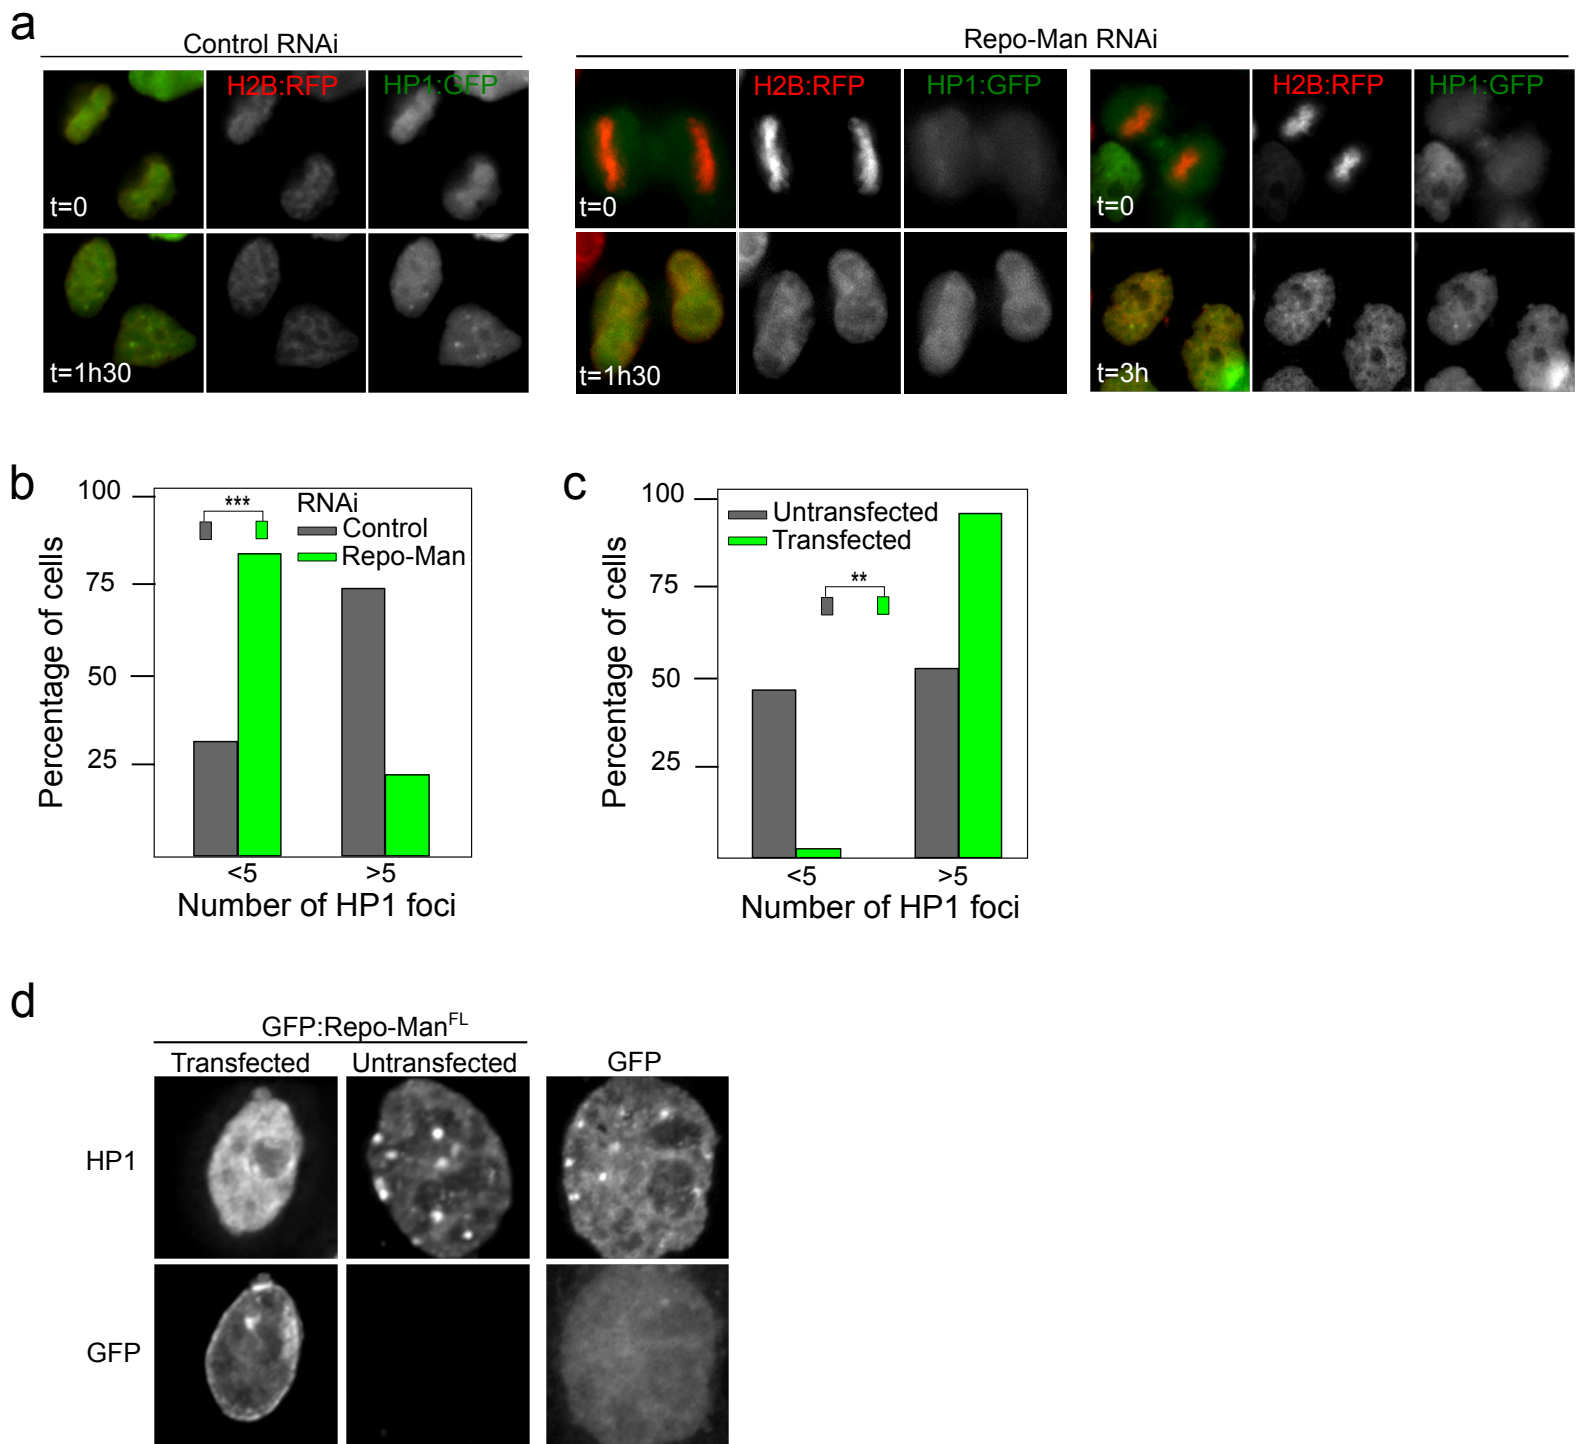

**Supplementary Figure 2: HP1 is disrupted from mitotic exit and depends on Repo-Man levels.**  
 (a) HeLa stable cells expressing RFP:H2B and transfected with GFP:HP1 were followed throughout mitosis upon control and Repo-Man RNAi. HP1 foci were present 1h30 after anaphase in control RNAi but absent after 1h30 and even 3h in Repo-Man RNAi. (b) Quantification of Repo-Man foci after cells passed through mitosis as described in (a). (c) GFP:Repo-Man full length was transiently expressed in HeLa and cells stained for HP1. HP1 foci were counted in transfected and untransfected cells. (d) Examples of HP1 staining in cells transfected or untransfected with GFP:Repo-Man full length. As a control, cells transfected with GFP alone were also stained for HP1. Chi-square test was applied. \*\*  $p < 0.01$ ; \*\*\*  $p < 0.001$ .

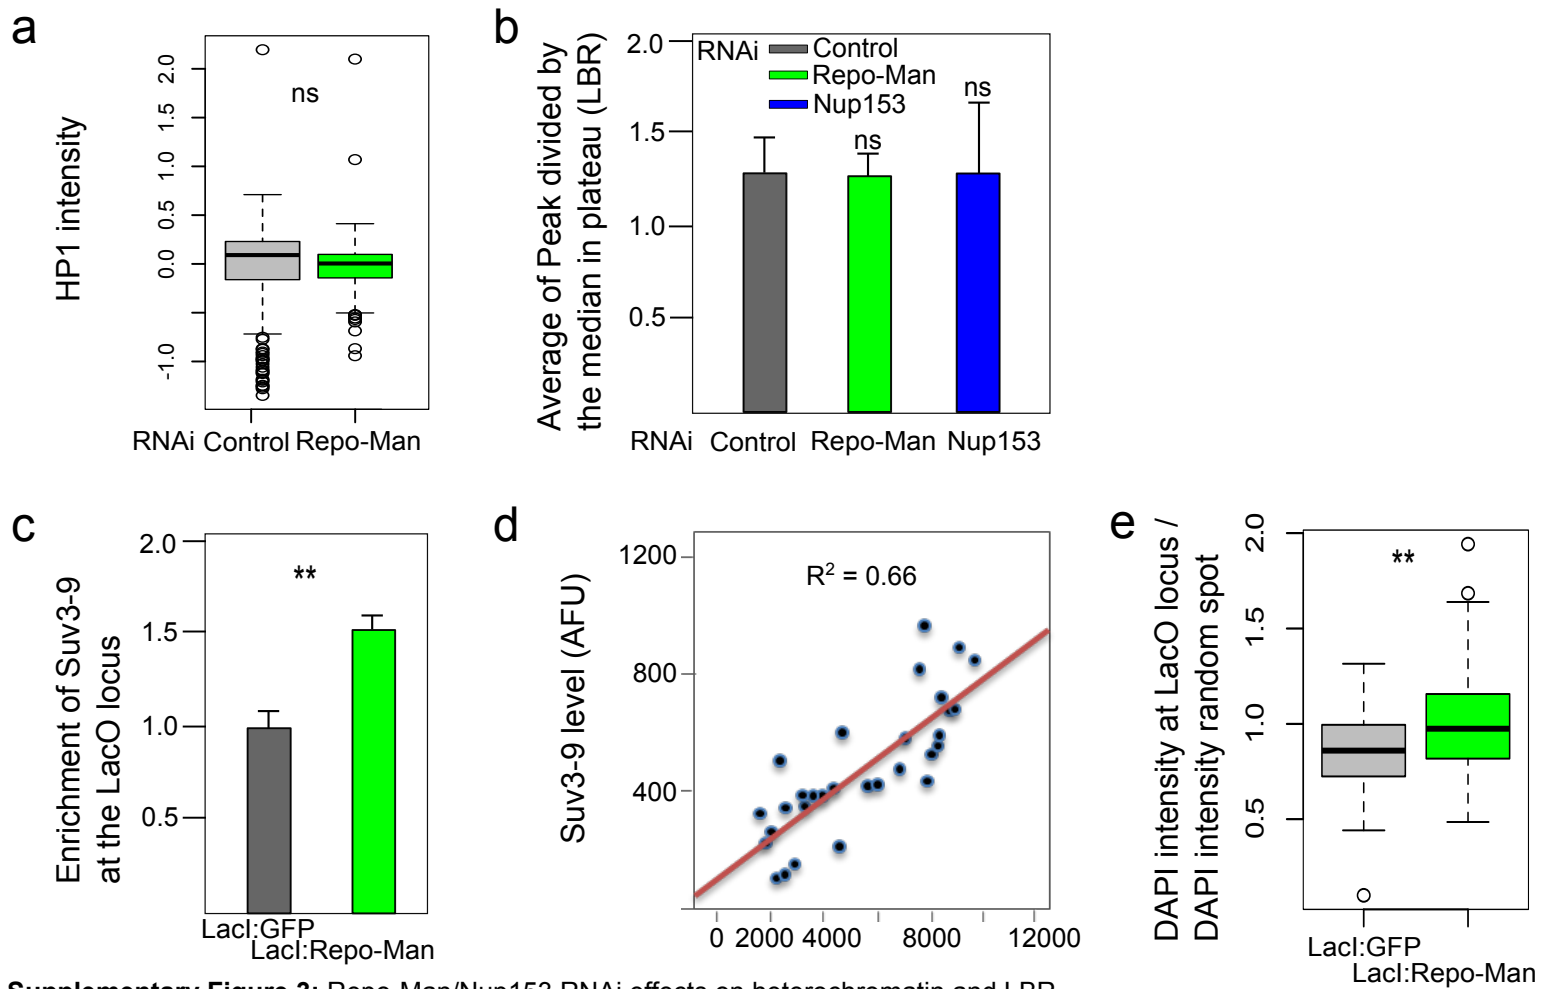

**Supplementary Figure 3: Repo-Man/Nup153 RNAi effects on heterochromatin and LBR.**

(a) Signal intensity of HP1 alpha foci after immunostaining of HeLa cells depleted for Repo-Man (green) and control oligo (grey). (b) LBR enrichment at the periphery after immunostaining of HeLa cells depleted for Repo-Man (green), Nup153 (blue) and control oligo (grey). (c) Measurement of Suv3-9 signal intensity in GFP:Lacl:Repo-Man or GFP:Lacl at the LacO array (stars indicate t-test  $** p < 0.01$ ). (d) Correlation between GFP:Lacl:Repo-Man enrichment at the LacO array and the levels of Suv39 with linear regression. (e) Measurement of DAPI signal intensity in the LacO array when DT40 cells are transfected with either Lacl:GFP or GFP:Lacl:Repo-Man (Mann-Whitney test was applied.  $** p < 0.01$ ).

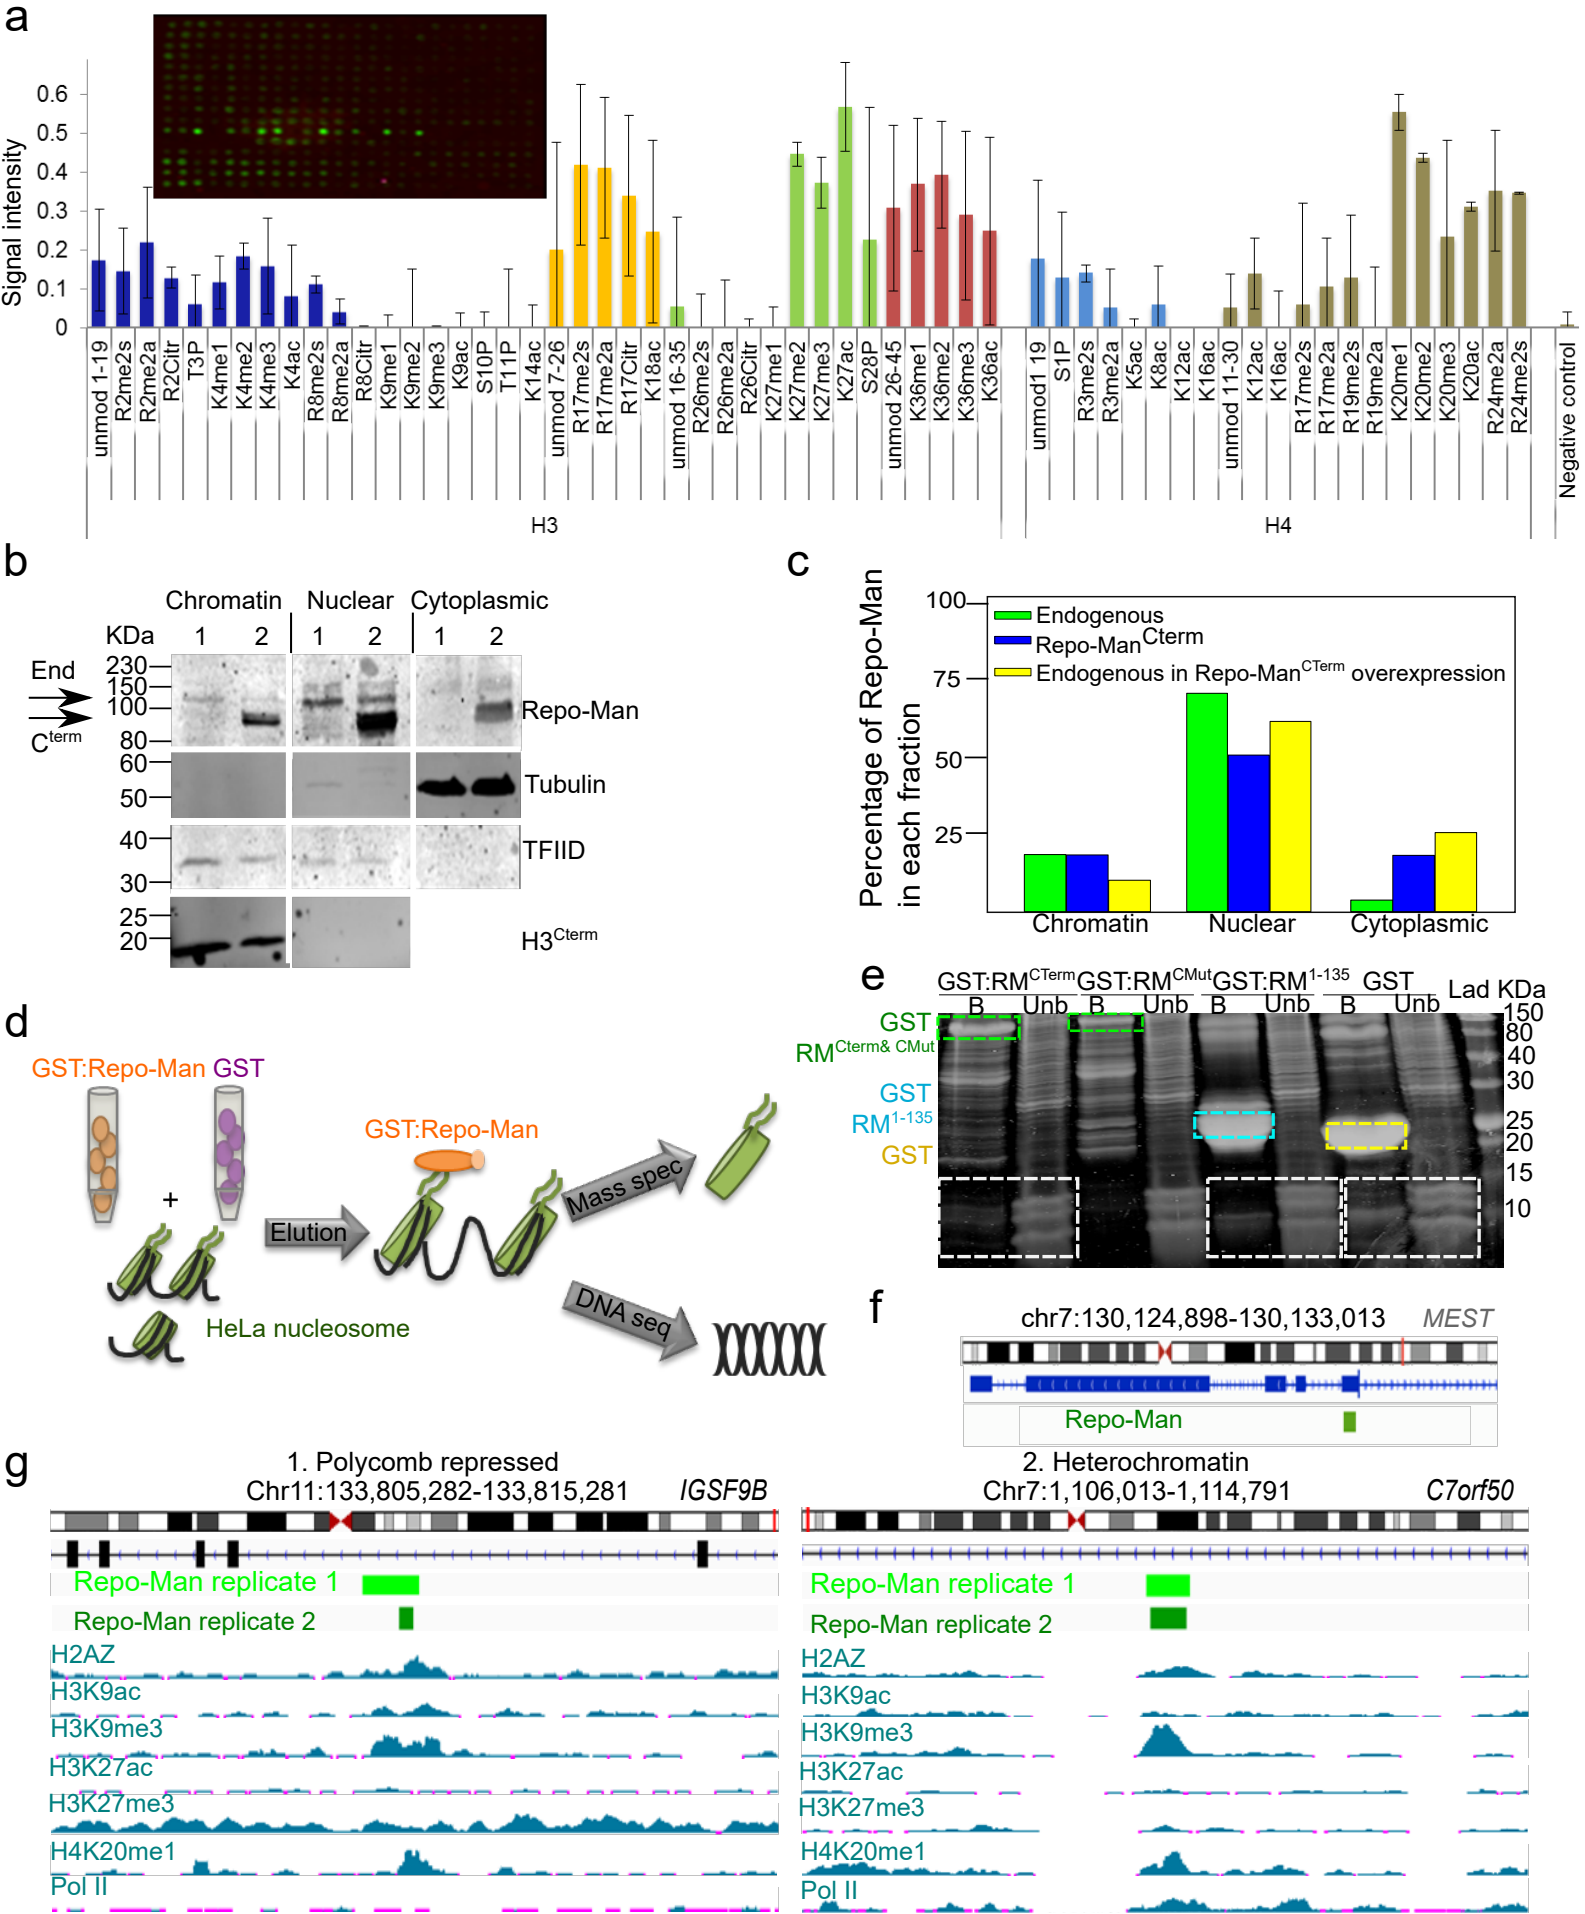

**Supplementary Figure 4: Repo-Man interactions with chromatin.**

(a) Recombinant GST tagged Repo-Man<sup>C<sup>term</sup></sup> or GST alone were incubated in a histone peptide array. The signal was detected with an anti-GST antibody and quantified with LICOR across two arrays (Fig. 4a). (b) Chromatin, nuclear and cytoplasmic extracts from HeLa cells expressing GFP (1) or GFP:Repo-Man<sup>C<sup>term</sup></sup> (2). TFIID, H3<sup>C<sup>term</sup></sup> and Tubulin antibodies were used as controls of nuclear, chromatin and cytoplasm fractions, respectively. Repo-Man antibody was used to detect endogenous and overexpressed RM. (c) Quantification of RM as in (b). (d) Overview of the TAG-proteogenomics. Recombinant GST:Repo-Man<sup>C<sup>term</sup></sup> or GST alone were incubated with nucleosomes extracted from HeLa. After pull-down, samples were separated by SDS-page and the histone fraction was analysed by Mass Spectrometry and the DNA extracted and sequenced. (e) White bars correspond to crops in Fig. 4e. Coloured bars the expression of GST:RM<sup>C<sup>term</sup></sup>, GST:RM<sup>1-135</sup> and GST alone, correspondently. (f) Repo-Man binding across MEST gene. (g) RM genome hits on a polycomb repressed gene, *IGSF9b*, and on a heterochromatin gene, *C7orf50*, classified as such by ChromHMM (Fig. 5e).

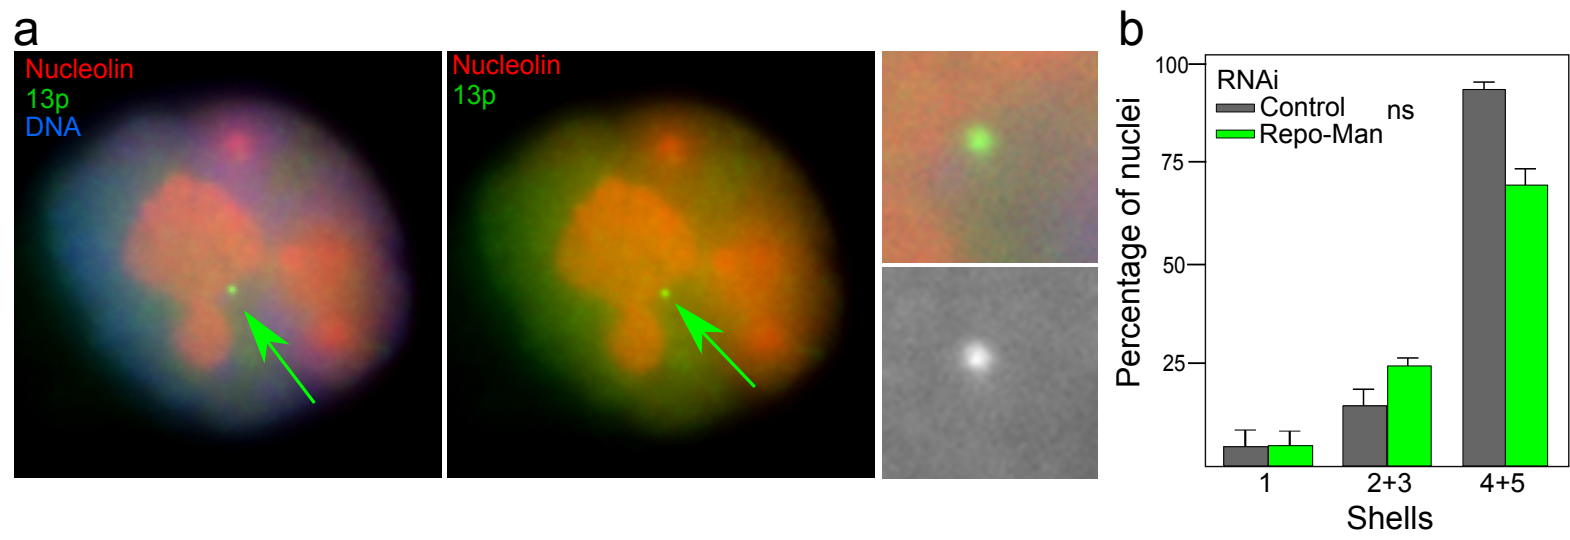

**c**

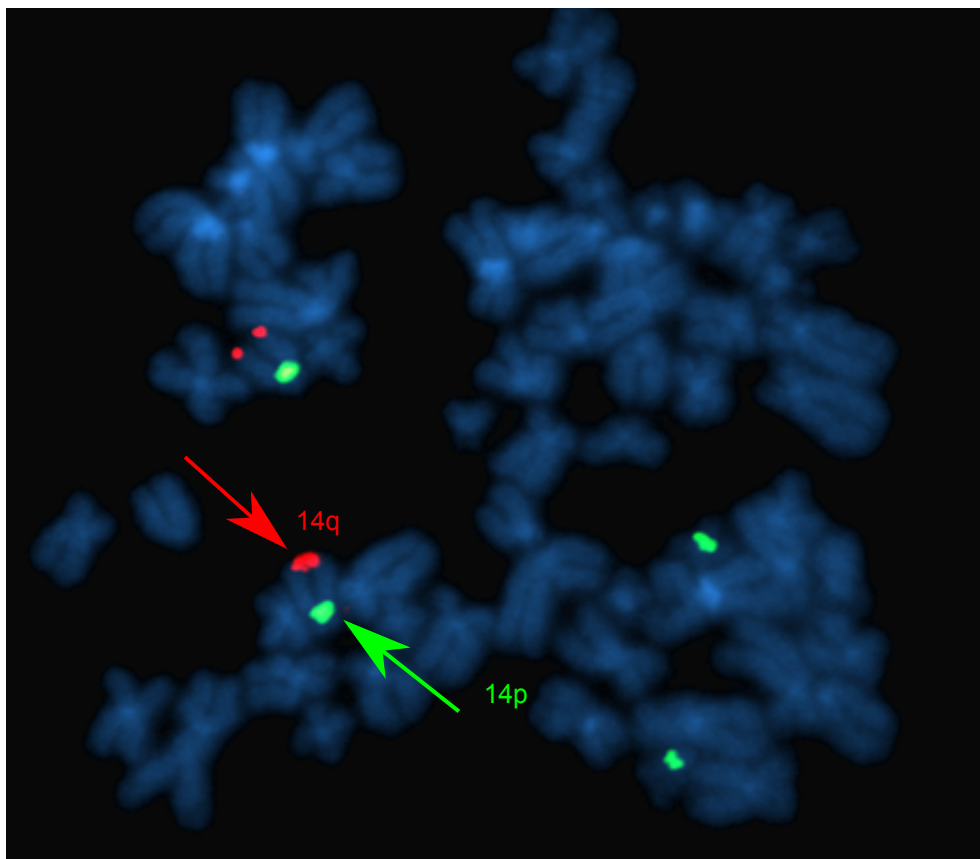

**Supplementary Figure 5: Repo-Man organises the nuclear position of specific chromosome regions.**  
 (a) HT1080 cells containing a LacO array inserted at chromosome 13p and expressing GFP:LacI were fixed and stained for Nucleolin.  
 (b) Position of the chr13p measured after RNAi with control (grey) or Repo-Man (green) oligos. (c) FISH on HeLa metaphase spreads with probe CTC-820M16 (red signal). The probe maps to the subtelomeric region of chromosome 14 (red arrow), as confirmed by the hybridization of the 22-14 alpha satellite probe (green signals), which labels the centromeres of chromosome 14 (green arrow) and 22.

**a**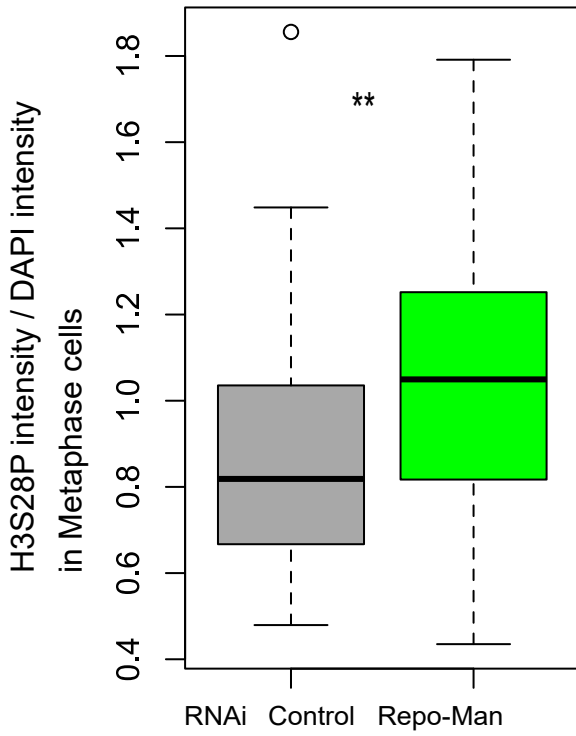**b**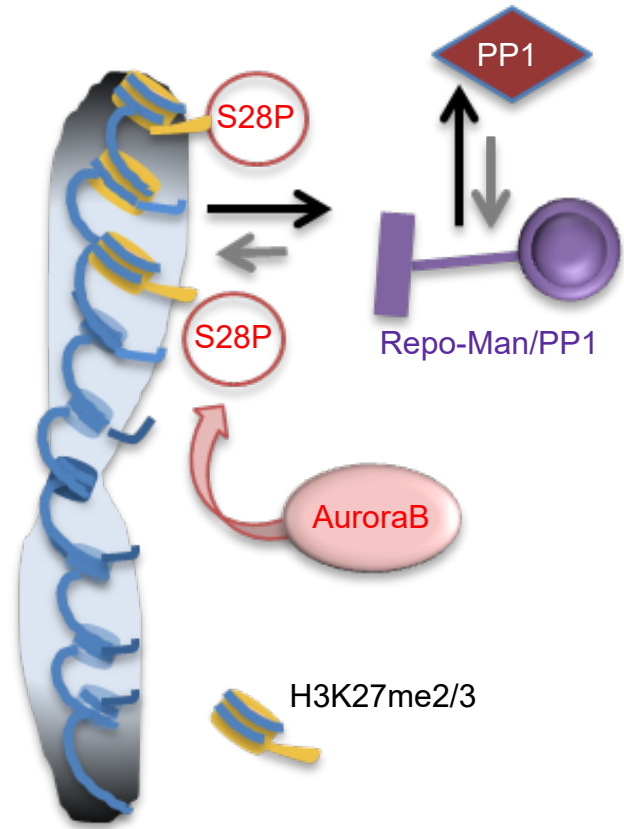**c**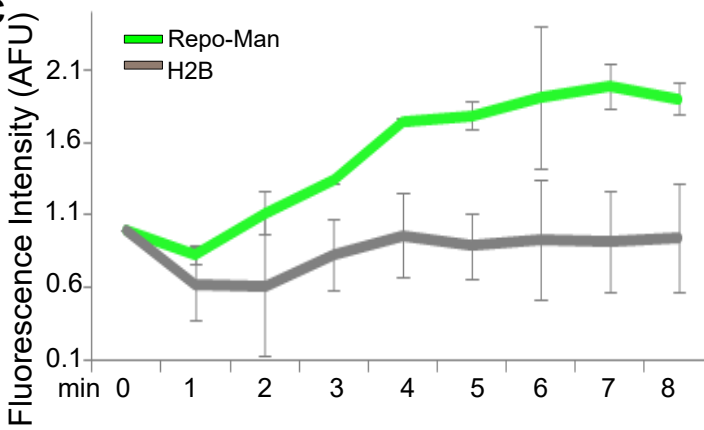**d**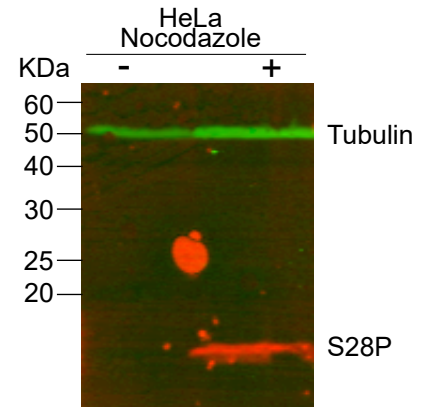**e**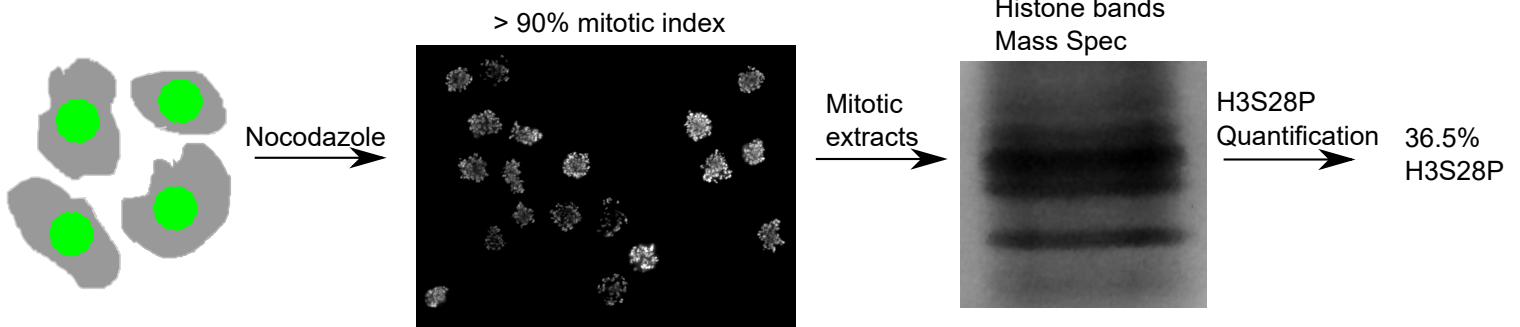

**Supplementary Figure 6: Repo-Man dephosphorylates S28 in mitosis.**

- (a) Intensity of H3S28P signal in mitotic HeLa cells after control or Repo-Man RNAi (Mann-Whitney test, \*\* p < 0.01).  
 (b) Repo-Man/PP1 complex regulation in mitosis and its dynamic binding to chromatin maintains the correct H3S28P levels in mitosis.  
 (c) Repo-Man and Histone H2B levels on chromosomes after mitotic exit. (d) HeLa cells were treated with nocodazole overnight to induce mitotic entry. Western blot using Serine 28 phosphorylation antibody and tubulin as a control. (e) Cells were treated with nocodazole overnight to induce mitosis (90% mitotic index) and histones from mitotic extracts were sent to Mass Spectrometry, as example here, to evaluate H3S28P content (36.5%).

## Supplementary Tables

**Supplementary Table 1:** Antibodies used in this study

| ANTIBODY      | SOURCE                        | DILUTION                          |
|---------------|-------------------------------|-----------------------------------|
| Repo-Man      | Protein Tech 17701-1-AP       | 1:250 (WB)                        |
| Repo-Man      | In house                      | Vagnarelli et al. 2011 1:300 (IF) |
| H3K9me3       | Active Motif 39161            | 1:1000 (WB) / 1:500 (IF)          |
| H3K9me2       | Active Motif 39240            | 1:500 (IF)                        |
| H3K27me2/3    | Active Motif 39535            | 1:1000 (WB) / 1:500 (IF)          |
| H3K9ac        | Abcam ab10812                 | 1:500 (IF)                        |
| H3S28P        | Abcam ab10543                 | 1:1000 (IF)                       |
| H3S28P        | Novus Biologicals (NB21-1188) | 1:500 (WB)                        |
| H3K9me3       | Abcam ab71999                 | 1:100 (IF)                        |
| H3-Cterm      | Active Motif 39163            | 1:1000 (WB)                       |
| LBR           | Abcam ab32535                 | 1:200 (IF)                        |
| Suv39         | Active Motif 39785            | 1:200 (IF)                        |
| HP1           | Millipore MAB3584             | 1:200 (IF)                        |
| Nup153        | Abcam ab24700                 | 1:300 (IF)                        |
| c-Myc         | Santa Cruz sc-40              | 1:200 (peptide array)             |
| GST           | Thermo CAB-4169               | 1:1000 (WB/peptide array)         |
| TFIID         | Santa Cruz sc-225             | 1:200 (WB)                        |
| GFP           | Roche 11814460001             | 1:1000 (IF)                       |
| alpha-Tubulin | Sigma B512                    | 1:1000 (IF) 1:3000 (WB)           |

**Supplementary Table 2:** qPCR primers used in this study

| Primer            | Sequence (5' to 3')     |
|-------------------|-------------------------|
| Expression        |                         |
| <i>GAPDH F</i>    | ACCACAGTCCATGCCATCAC    |
| <i>GAPDH R</i>    | TCCACCACCCTGTTGCTGTA    |
| <i>SLC6A19 F</i>  | CTCCAGCTACAACCTCTGTGCAC |
| <i>SLC6A19 R</i>  | CCAATGACGGAGTAGACCACGA  |
| <i>ADCY2 F</i>    | AATCAGGTGGCGATTCTGCGTG  |
| <i>ADCY2 R</i>    | AGTTTACCCGCAGGAACACGGA  |
| <i>GPR133 F</i>   | AAGACTCGGTTGCTGCTGTT    |
| <i>GPR133 R</i>   | GTCGGGCTCTCCACTCATTA    |
| <i>SLC6A18 F</i>  | GATGACGTAGGGGATGAGGA    |
| <i>SLC6A18 R</i>  | TACCTCCTGAGCTGCATTGG    |
| <i>PPP2R2C F</i>  | CCGTAAGGTCCTCCATGTTG    |
| <i>PPP2R2C R</i>  | CTACATGTCGGCGGATGAC     |
| <i>Repo-Man F</i> | GAGGCAGGAAAAGAGTCCGAGA  |
| <i>Repo-Man R</i> | CTCCGACGTTTGGAGGACAACA  |
| ChIP              |                         |
| <i>MYT1 F</i>     | CCGTCAAGTCCCATTTTGGGA   |
| <i>MYT1 R</i>     | AGTTCAGGAGAGAAGTTGCG    |
| <i>SLC6A19 F</i>  | ACGCATGCTTTTCGTTCTTCT   |
| <i>SLC6A19 R</i>  | GAAACTGGAGCTTCCTGCAC    |
| <i>ADCY2 F</i>    | ACCGGCGGTTAAGACTTTTT    |
| <i>ADCY2 R</i>    | ACTCACGGAAAGCCTCAAGA    |
| <i>GPR133 F</i>   | GGGCAGCCATGTGTTAGAAT    |
| <i>GPR133 R</i>   | TAGTATCGGCCCTCTGTTG     |
| <i>IGSF9B F</i>   | CCTGAAGCTCAGAACCCAAG    |
| <i>IGSF9B R</i>   | CTGATAGAGATGGCGGTGGT    |
| <i>PPP2R2C F</i>  | TGATAAGGGCCCAATAGCTG    |
| <i>PPP2R2C R</i>  | AAATTCCCAAGATGCAACA     |
